# Supplementary material for: Chronic kidney disease is common in sickle cell disease: a cross-sectional study in the Tema Metropolis, Ghana
Source: PubMed Central journal article supplement (PMC4448314; doi:10.1186/s12882-015-0072-y), 2015-05-29
Supplement: 12882_2015_72_MOESM1_ESM.pdf [file 12882_2015_72_MOESM1_ESM.pdf]

**QUESTIONNAIRE**

**Chronic Kidney Disease in Sickle Cell Disease: a cross-sectional study in the Tema Metropolis, Ghana**

This questionnaire is aimed at gathering additional information to determine the prevalence of chronic kidney disease amongst sickle cell patients. After reading the participation information leaflet, kindly sign the consent form preceding the filling of this questionnaire. You will be guided through the questionnaire and this will take about 15 minutes to complete. Information gathered and published will not be linked to you in any form. Thank you for participating.

CODE: \_\_\_\_\_

Contact: \_\_\_\_\_

Date: \_\_ / \_\_ / 20\_\_

|                                   |                          |
|-----------------------------------|--------------------------|
| Written informed consent obtained | <input type="checkbox"/> |
|-----------------------------------|--------------------------|

**1.0 Demographic Information (please tick or write where appropriate)**

|            |               |                                                               |
|------------|---------------|---------------------------------------------------------------|
| <b>1.1</b> | <b>Name</b>   |                                                               |
| <b>1.2</b> | <b>Age</b>    | Please write here .....                                       |
| <b>1.3</b> | <b>Gender</b> | Male <input type="checkbox"/> Female <input type="checkbox"/> |

**2.0 Anthropometric/Clinical Data**

| Parameter   | Entry | Parameter  | Entry |
|-------------|-------|------------|-------|
| Weight (cm) |       | SBP (mmHg) |       |
| Height (cm) |       | DBP (mmHg) |       |
| BMI         |       |            |       |

**3.0 Miscellaneous (to be filled by interviewer)**

|            |                                            |                          |
|------------|--------------------------------------------|--------------------------|
| <b>3.1</b> | Urine sample provided                      | <input type="checkbox"/> |
| <b>3.2</b> | Blood samples taken                        | <input type="checkbox"/> |
| <b>3.3</b> | Hb genotype (confirm from patient records) | <input type="checkbox"/> |
